# Supplementary material
Source: PubMed Central journal article supplement (PMC3606285)
Supplement: NIHMS437990-supplement-1.pdf [file NIHMS437990-supplement-1.pdf]

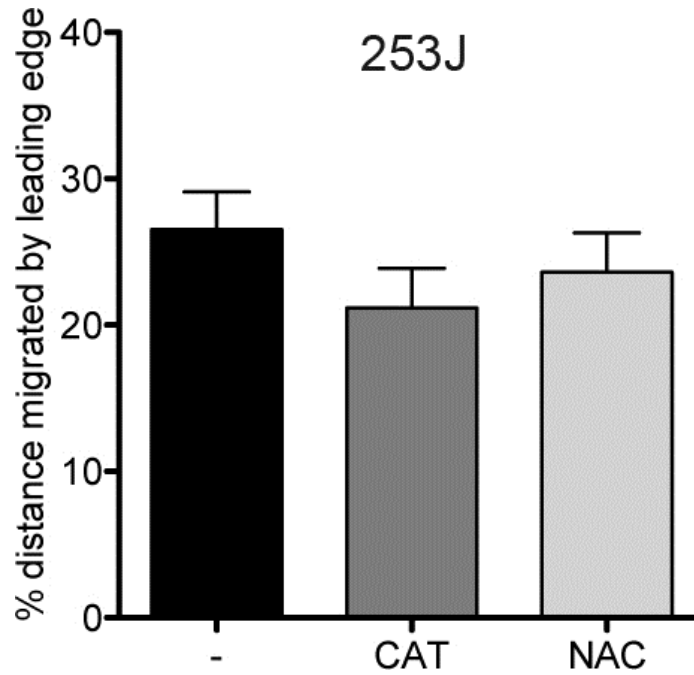

**Supplemental Fig. 1** Catalase (CAT, 500U/ml) and N-acetylcysteine (NAC, 2mM) do not significantly inhibit 253J cell migration in a wound healing assay. Cells were pre-treated for 18 hours in complete media. Wound healing was carried out in 0% serum media containing the same antioxidant concentrations for 24 hrs (n=5).
