# Supplementary material
Source: PubMed Central journal article supplement (PMC3606285)
Supplement: NIHMS437990-supplement-2.pdf [file NIHMS437990-supplement-2.pdf]

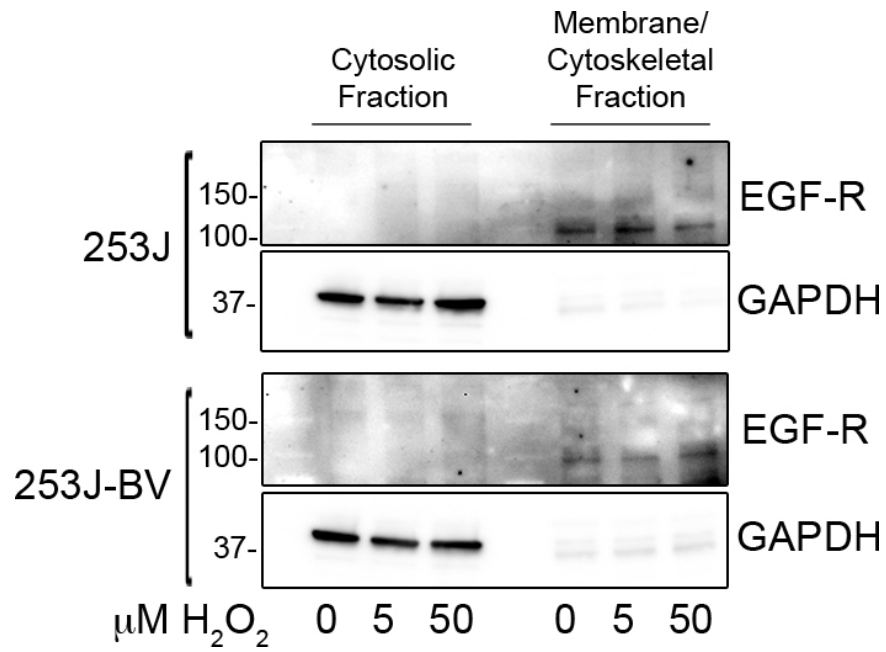

**Supplemental Fig. 2** Loading controls for Cytosolic (GAPDH) and Membrane fractions (EGF-R). Cells were treated as in Figure 3 and the membrane/cytoskeletal fractions obtained as outlined in the methods section.
